# Supplementary material for: Drug seller adherence to clinical protocols with integrated management of malaria, pneumonia and diarrhoea at drug shops in Uganda
Source: PubMed Central journal article supplement (PMC4502601; doi:10.1186/s12936-015-0798-9), 2015-07-16

## 5. ADVICE FOR ALL CHILDREN TREATED AT HOME

### Give more fluids and continue feeding

- Advise caregiver to give plenty of homemade fluids such as:
  - Clean water
  - Soup
  - Yoghurt drinks
  - Light porridge
  - ORS

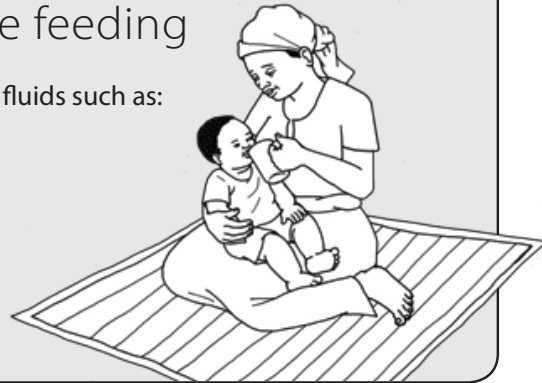

### Go to the health facility if...

- Advise to go to the health facility if the child:
  - Cannot drink or feed
  - Has blood in stool
  - Becomes sicker
  - Develops any other danger sign
  - Has not improved in 2 days

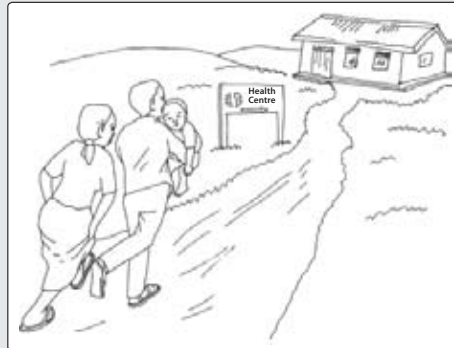

### Sleep under a net

- Advise caregiver to be sure the child sleeps under a mosquito net.

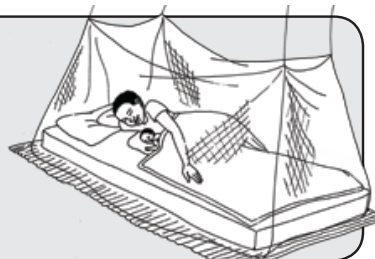

### Follow up child in 3 days

- Decide if you (the VHT member) will go to the child or if the caregiver will bring the child to you.

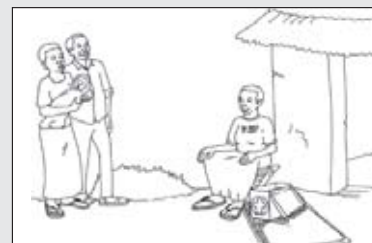

## 6. ROUTINE CARE FOR THE NEWBORN

### Keeping the baby warm

Advise the caregiver on the following:

- Wrap the baby in warm, dry clothes, including the head and feet.
- Put the baby in skin-to-skin contact with the mother, as shown in the picture.
- Delay the baby's first bath until after 24 hours.

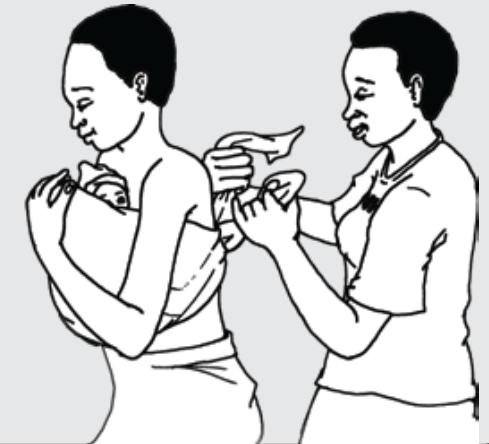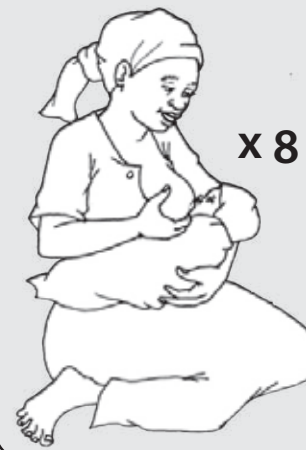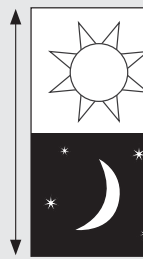

### Breastfeeding exclusively

Advise the mother on the following:

- Start breastfeeding immediately after birth.
- Feed the baby on only breast milk, on demand, at least 8 times a day.
- Ensure the baby is well positioned and attached on the mother's breast.

### Skin and cord care

Advise the caregiver on the following:

- Wash hands before handling the baby.
- Do not apply anything on the cord. Leave the cord dry and open.
- Bathe the baby with clean soap and water.

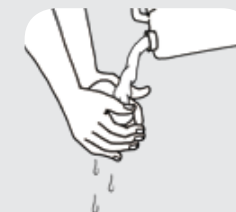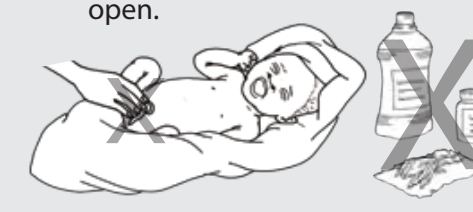

Supplement: 12936_2015_798_MOESM3_ESM.pdf [file 12936_2015_798_MOESM3_ESM.pdf]
