# Supplementary material for: Drug seller adherence to clinical protocols with integrated management of malaria, pneumonia and diarrhoea at drug shops in Uganda
Source: PubMed Central journal article supplement (PMC4502601; doi:10.1186/s12936-015-0798-9), 2015-07-16
Supplement: 12936_2015_798_MOESM2_ESM.pdf [file 12936_2015_798_MOESM2_ESM.pdf]

# 1. ASK THE CAREGIVER

How old is the child?

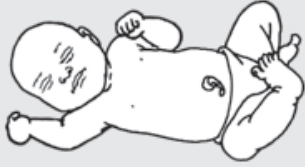

0 - 7 days

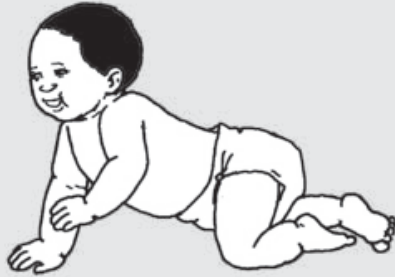

2 - 11 months

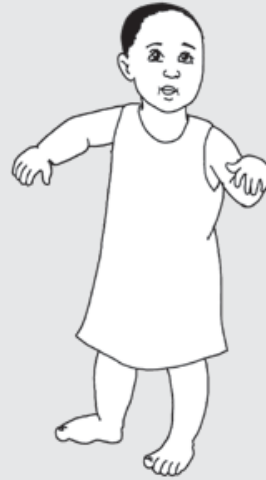

1 - 2 years

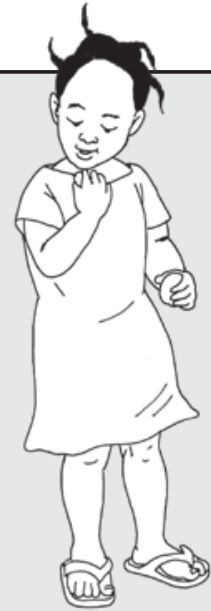

3 - 5 years

# 2. ASK - CHILD'S PROBLEMS

Does the child have cough, diarrhoea or fever?

*If yes, for how long?*

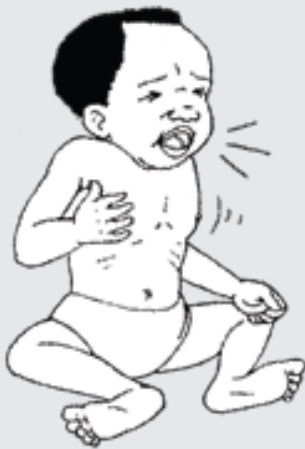

Cough

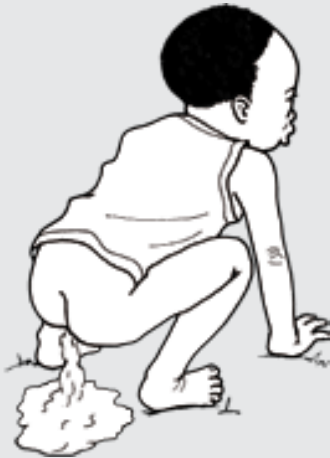

Diarrhoea

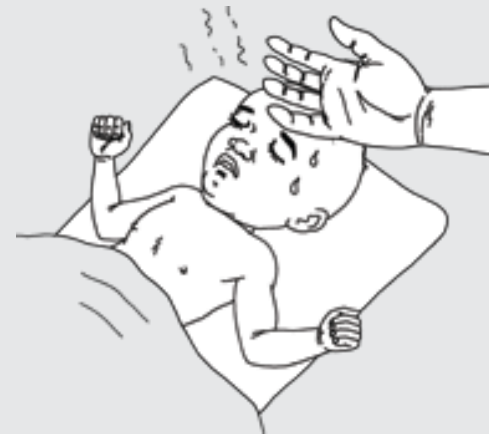

Fever

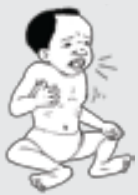

If **Cough** is present, check for **Fast Breathing**.

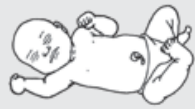

0 - 7 days

**60 or more**  
breaths per minute

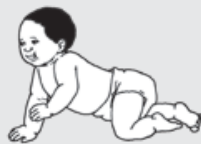

2-11 months

**50 or more**  
breaths per minute

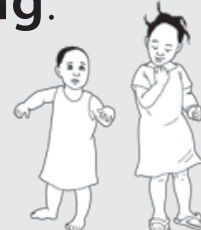

1-5 years

**40 or more**  
breaths per minute

# 3. ASK AND LOOK FOR DANGER SIGNS AND REFER

Refer to Step 4a because children with some of these danger signs need pre-referral treatment.

Any child or newborn with...

- Vomiting**  Vomits everything
- Chest in-drawing**
- Convulsions**
- Not able to breastfeed or drink**
- Very sleepy or unconscious**

A newborn with...

- Infected umbilical cord**
- Many skin pustules**

A child with...

- Cough**  For 21 days or more
- Diarrhoea**  For 14 days or more, or with blood
- Fever**  For 7 days or more

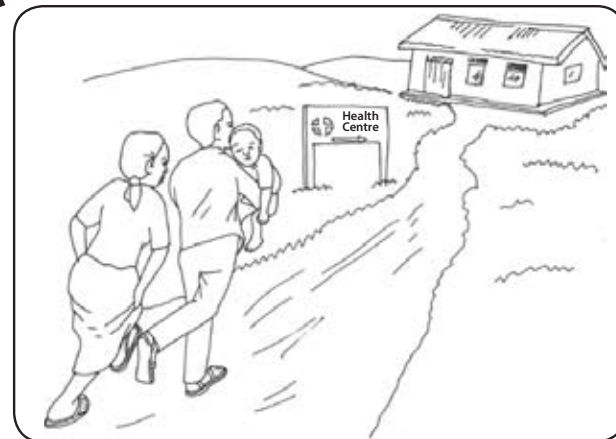

## 4a. PRE-REFERRAL TREATMENT

If the child has any of the danger signs below, give the following treatment:

**Diarrhoea**  
For 14 days or more, or with blood in the stool

- Begin giving the child ORS before you refer. Advise caregiver to continue giving ORS to the child on the way to the health centre.

**Chest In-drawing or Fast Breathing**  
With a Danger Sign

- Give first dose of Amoxicillin before you refer.
- 2 - 11 months: 2 tabs from RED PACK
- 1 - 5 years: 3 tabs from GREEN PACK

**Fever**  
For 7 days or more

- Give first dose oral Anti-Malarial ACT.
- 4 months - 2 years: 1 tab from YELLOW PACK
- 3 - 5 years: 2 tabs from BLUE PACK

**Fever and a General Danger Sign**

- Give Rectal Artesunate.
- 4 - 11 months: 1 cap
- 1 - 3 years: 2 caps
- 4 - 5 years: 4 caps
- Help caregiver give dose.

**Newborn**  
With a Danger Sign

- Give first dose of Amoxicillin.

## 4b. TREAT AND ADVISE

If the child has any of the symptoms below with NO danger signs, give the following treatment:

**Cough**  
With fast breathing for less than 21 days

- Give oral antibiotic - Amoxicillin.
- Advise caregiver to give:
  - 2 - 11 months: 2 tabs twice a day for 5 days from RED PACK
  - 1 - 5 years: 3 tabs twice a day for 5 days from GREEN PACK
- Help caregiver give first dose now.

**Diarrhoea**  
For less than 14 days, and without blood in stool

- Give ORS. Help caregiver give child ORS solution in front of you until the child is no longer thirsty.
- Give caregiver 2 ORS packets to take home. Advise caregiver to give as much as child wants, but at least 1/2 cup ORS solution after each loose stool.
- Give zinc supplement. Give 1 dose daily for 10 days.
  - 2 to 6 months: 1/2 a tab once a day for 10 days
  - 6 months to 5 years: 1 tab once a day for 10 days
- Help caregiver give first dose now.

**Fever**  
Less than 7 days

- Give oral Anti-Malarial ACT.
  - 4 months to 2 years: 1 tab twice a day for 3 days from YELLOW PACK
  - 3 years to 5 years: 2 tab twice a day for 3 days from BLUE PACK
- Help caregiver give first dose now.
- Advise caregiver on use of a bed net (LLIN).
