# Supplementary material for: Drug seller adherence to clinical protocols with integrated management of malaria, pneumonia and diarrhoea at drug shops in Uganda
Source: Malar J. 2015 Jul 16;14:277. doi: 10.1186/s12936-015-0798-9 (PMC4502601; doi:10.1186/s12936-015-0798-9)
Supplement: Additional file 1: — The ICCM register: This is a copy of the standard book, where drug shop attendants (and community health workers) record all children seen with symptoms of malaria, pneumonia or diarrhoea. [file 12936_2015_798_MOESM1_ESM.pdf]

## ICCM A2L DRUGSHOP REGISTER FOR CHILDREN 5 YEARS AND BELOW

District: \_\_\_\_\_ Sub County: \_\_\_\_\_ Facility: \_\_\_\_\_ Reporting Month and Year: \_\_\_\_\_

[illegible]

| DIARRHOEA SUMMARY                                                |                  |           |          |      |
|------------------------------------------------------------------|------------------|-----------|----------|------|
| Add up the total numbers from above and write in each box below. |                  |           |          |      |
| Diarrhoea                                                        | With danger sign | Recovered | Referred | Died |
|                                                                  |                  |           |          |      |

  

| ORS        | Packets | ZINC       | 1/2 tablet<br>(0 to 6 months) | 1 tablet<br>(7 months to 5 yrs) |
|------------|---------|------------|-------------------------------|---------------------------------|
| Received:  |         | Received:  |                               |                                 |
| Given out: |         | Given out: |                               |                                 |
| Remaining: |         | Remaining: |                               |                                 |

| FAST BREATHING SUMMARY                                           |                         |                         |          |      |
|------------------------------------------------------------------|-------------------------|-------------------------|----------|------|
| Add up the total numbers from above and write in each box below. |                         |                         |          |      |
| Fast Breathing                                                   | With danger sign        | Recovered               | Referred | Died |
|                                                                  |                         |                         |          |      |
| AMOXICILLIN                                                      | Red<br>(4 to 11 months) | Green<br>(1 to 5 years) |          |      |
| Received:                                                        |                         |                         |          |      |
| Given out:                                                       |                         |                         |          |      |
| Remaining:                                                       |                         |                         |          |      |

| FEVER SUMMARY                                                    |  |                  |  |           |
|------------------------------------------------------------------|--|------------------|--|-----------|
| Add up the total numbers from above and write in each box below. |  |                  |  |           |
| Fever                                                            |  | With danger sign |  | Recovered |
|                                                                  |  |                  |  |           |
| Referred                                                         |  | Died             |  |           |
|                                                                  |  |                  |  |           |

  

| ACT        | Yellow<br>(4 months to 2 years) | Blue<br>(3 to 7 years) | RDT SUMMARY |  |
|------------|---------------------------------|------------------------|-------------|--|
| Received:  |                                 |                        | Received:   |  |
| Given out: |                                 |                        | Used:       |  |
| Remaining: |                                 |                        | Remaining:  |  |

**Filled by:** Name ..... **Signature** ..... **Title** ..... **Date** .....
